# Supplementary figures and images for: Highly Branched Sn‐Doped ZnO Nanostructures for Sunlight Driven Photocatalytic Reactions
Source: Hindawi journal article supplement (doi:10.1155/2014/381819), 2014-01-01

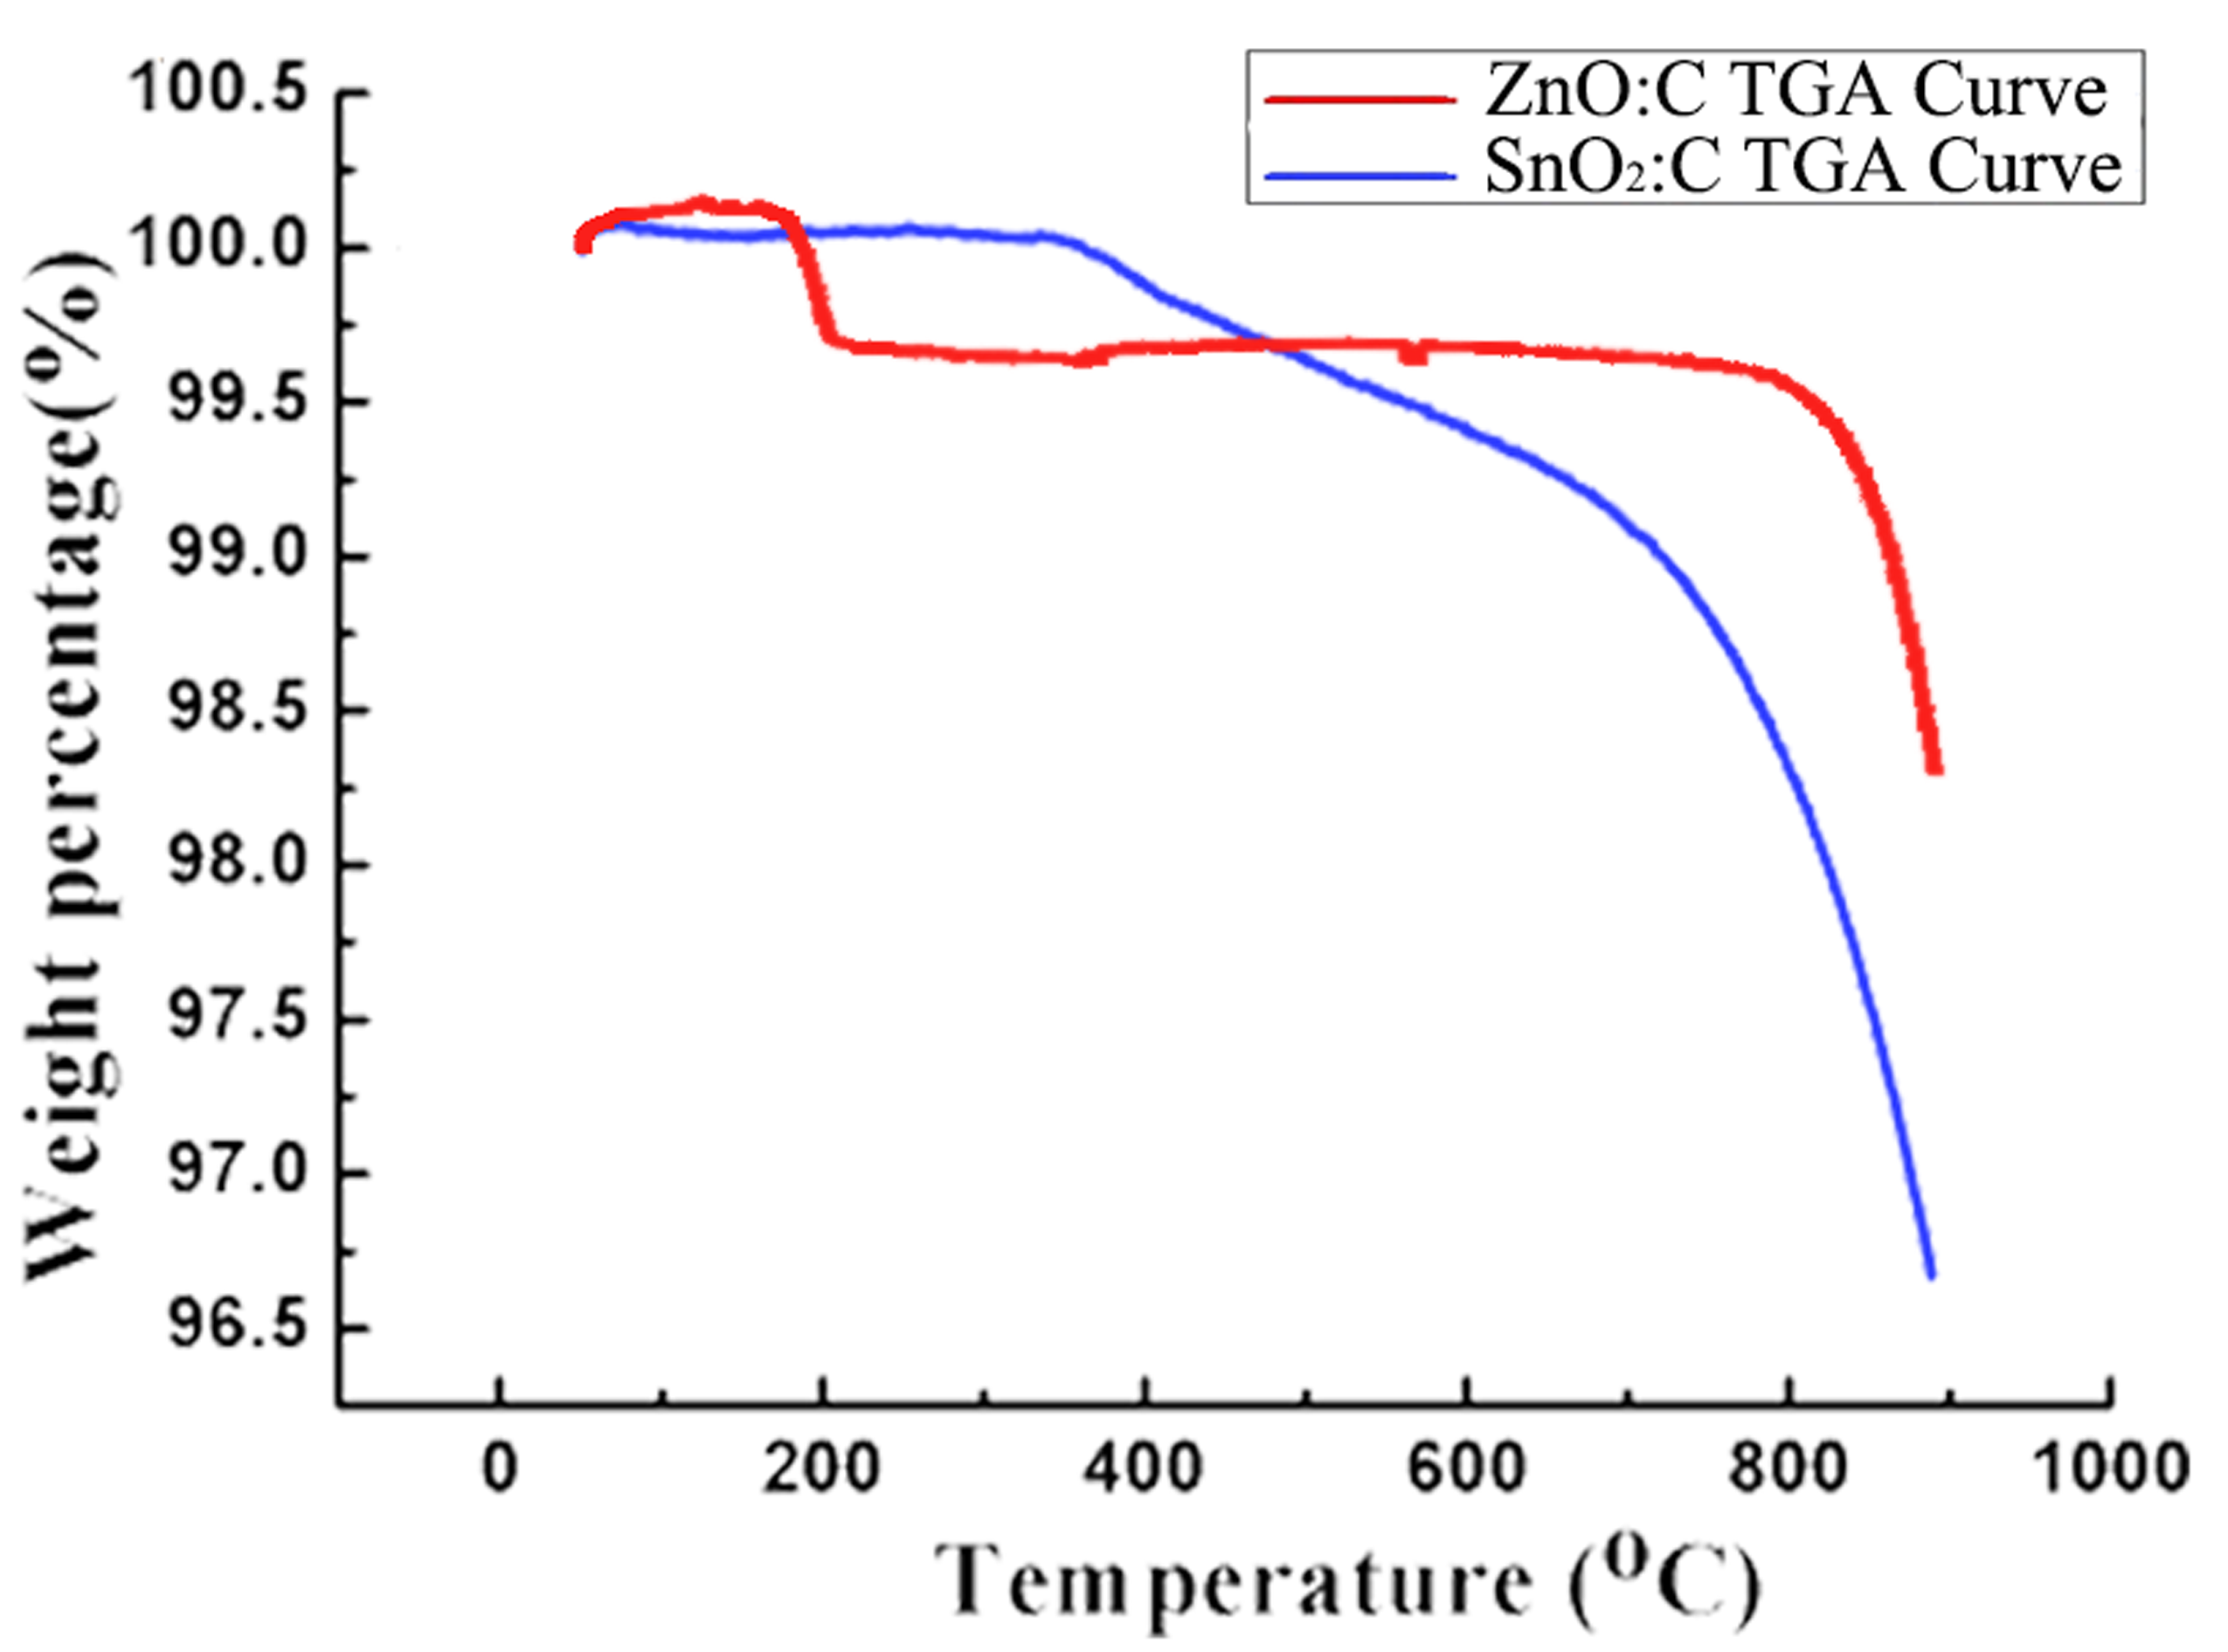


FIGURE S: The TGA of ZnO:C and SnO2:C

Supplement: f1 [file 381819.f1.doc]
